# Supplementary material
Source: PubMed Central journal article supplement (PMC6638100)
Supplement: MPP-19-2397-s013.pdf [file MPP-19-2397-s013.pdf]

1 **Table S2.** Strains and plasmids used in this study.

| Strains                                     | Description                                                                                          | Reference      |
|---------------------------------------------|------------------------------------------------------------------------------------------------------|----------------|
| DH5 $\alpha$                                | F' endA1 hsdR17 (rk- mk+) supE44 thi-1 recA1 gyrA relA1 f80dlacZDM15 (lacZYA-argF) U169              | Lab collection |
| <i>X. oryzae</i> pv. <i>oryzae</i> (BXO43)  | WT <i>rif-2</i> ; Rif <sup>r</sup>                                                                   | Lab collection |
| $\Delta$ <i>fliC</i>                        | In-frame deletion of <i>fliC</i> ; derivative of BXO43; Rif <sup>r</sup>                             | This study     |
| $\Delta$ <i>mcp2</i>                        | In-frame deletion of <i>mcp2</i> ; derivative of BXO43; Rif <sup>r</sup>                             | This study     |
| $\Delta$ <i>mcp2</i> (Mcp2 <sup>+</sup> )   | $\Delta$ <i>mcp2</i> mutant reconstituted with the wild type <i>mcp2</i> ; Rif <sup>r</sup>          |                |
| $\Delta$ <i>cheR1</i>                       | In-frame deletion of <i>cheR1</i> ; derivative of BXO43; Rif <sup>r</sup>                            | This study     |
| $\Delta$ <i>cheR2</i>                       | In-frame deletion of <i>cheR2</i> ; derivative of BXO43; Rif <sup>r</sup>                            | This study     |
| $\Delta$ <i>cheR2</i> (CheR2 <sup>+</sup> ) | $\Delta$ <i>cheR2</i> mutant reconstituted with the wild type <i>cheR2</i> ; Rif <sup>r</sup>        | This study     |
| $\Delta$ <i>cheR3</i>                       | In-frame deletion of <i>cheR3</i> ; derivative of BXO43; Rif <sup>r</sup>                            | This study     |
| $\Delta$ <i>cheB1</i>                       | In-frame deletion of <i>cheB1</i> ; derivative of BXO43; Rif <sup>r</sup>                            | This study     |
| $\Delta$ <i>cheB2</i>                       | In-frame deletion of <i>cheB2</i> ; derivative of BXO43; Rif <sup>r</sup>                            | This study     |
| $\Delta$ <i>cheB2</i> (CheB2 <sup>+</sup> ) | $\Delta$ <i>cheB2</i> mutant reconstituted with the wild type <i>cheB2</i> ; Rif <sup>r</sup>        | This study     |
| $\Delta$ <i>cheA1</i>                       | In-frame deletion of <i>cheA1</i> ; derivative of BXO43; Rif <sup>r</sup>                            | This study     |
| $\Delta$ <i>cheA2</i>                       | In-frame deletion of <i>cheA2</i> ; derivative of BXO43; Rif <sup>r</sup>                            | This study     |
| $\Delta$ <i>cheA2</i> /pCheA2               | $\Delta$ <i>cheA2</i> mutant harbouring wild type <i>cheA2</i> in plasmid; pCheA2; Spec <sup>r</sup> | This study     |
| $\Delta$ <i>cheA3</i>                       | In-frame deletion of <i>cheA3</i> ; derivative of BXO43; Rif <sup>r</sup>                            | This study     |
| $\Delta$ <i>cheW1</i>                       | In-frame deletion of <i>cheW1</i> ; derivative of BXO43; Rif <sup>r</sup>                            | This study     |
| $\Delta$ <i>cheW2</i>                       | In-frame deletion of <i>cheW2</i> ; derivative of BXO43; Rif <sup>r</sup>                            | This study     |
| $\Delta$ <i>cheW2</i> (CheW2 <sup>+</sup> ) | $\Delta$ <i>cheW2</i> mutant reconstituted with the wild type <i>cheW2</i> ; Rif <sup>r</sup>        | This study     |
| $\Delta$ <i>cheW3</i>                       | In-frame deletion of <i>cheW3</i> ; derivative of BXO43; Rif <sup>r</sup>                            | This study     |
| $\Delta$ <i>vieA</i>                        | In-frame deletion of <i>vieA</i> ; derivative of BXO43; Rif <sup>r</sup>                             | This study     |
| $\Delta$ <i>cheY1</i>                       | In-frame deletion of <i>cheY1</i> ; derivative of BXO43; Rif <sup>r</sup>                            | This study     |
| $\Delta$ <i>cheY1</i> (CheY1 <sup>+</sup> ) | $\Delta$ <i>cheY1</i> mutant reconstituted with the wild type <i>cheY1</i> ; Rif <sup>r</sup>        | This study     |
| $\Delta$ <i>cheY2</i>                       | In-frame deletion of <i>cheY2</i> ; derivative of BXO43; Rif <sup>r</sup>                            | This study     |
| $\Delta$ <i>cheV</i>                        | In-frame deletion of <i>cheV</i> ; derivative of BXO43; Rif <sup>r</sup>                             | This study     |
| $\Delta$ <i>cheZ</i>                        | In-frame deletion of <i>cheZ</i> ; derivative of BXO43; Rif <sup>r</sup>                             | This study     |
| $\Delta$ <i>cheD</i>                        | In-frame deletion of <i>cheD</i> ; derivative of BXO43; Rif <sup>r</sup>                             | This study     |
| $\Delta$ <i>pdeA</i>                        | In-frame deletion of <i>pdeA</i> ; derivative of BXO43; Rif <sup>r</sup>                             | This study     |

|                         |                                                                                                                                                                                                    |                               |
|-------------------------|----------------------------------------------------------------------------------------------------------------------------------------------------------------------------------------------------|-------------------------------|
| Xoo <i>PcheA2::gusA</i> | Chromosomal <i>gusA</i> fusion with the <i>cheA2</i> promoter in the Xoo background; Kan <sup>r</sup> ,Amp <sup>r</sup>                                                                            | This study                    |
| Xoo <i>PcheR2::gusA</i> | Chromosomal <i>gusA</i> fusion with the <i>cheR2</i> promoter in the Xoo background; Kan <sup>r</sup> ,Amp <sup>r</sup>                                                                            | This study                    |
| Xoo <i>PfliC::gusA</i>  | Chromosomal <i>gusA</i> fusion with the <i>fliC</i> promoter in the Xoo background; Kan <sup>r</sup> ,Amp <sup>r</sup>                                                                             | This study                    |
| Xoo <i>PmotA::gusA</i>  | Chromosomal <i>gusA</i> fusion with the <i>motA</i> promoter in the Xoo background; Kan <sup>r</sup> ,Amp <sup>r</sup>                                                                             | This study                    |
|                         |                                                                                                                                                                                                    |                               |
| <b>Plasmids</b>         |                                                                                                                                                                                                    |                               |
| pK18mobsacB             | Km <sup>r</sup> pUC18 derivative; <i>lacZa</i> mobs site sacB                                                                                                                                      | Schäfer <i>et al.</i> , 1994  |
| pVO155                  | pUC119 derivative carrying promoter less <i>gusA</i> ; Km <sup>r</sup> Amp <sup>r</sup>                                                                                                            | Oke and Long, 1999            |
| pK18mob                 | Km <sup>r</sup> pUC18 derivative; <i>lacZa</i> mobs site                                                                                                                                           | Pridmore <i>et al.</i> , 1987 |
| pHM1                    | Broad-host-range cosmid vector, pSa <i>ori</i> , Spec <sup>r</sup>                                                                                                                                 | Innes <i>et al.</i> , 1988    |
| pRKV1                   | pK18mobsacB with a 0.3kb PCR fragment of <i>rpfF</i> 5' end and a 0.202kb PCR fragment of <i>rpfF</i> 3' end from the Xoo genome; Km <sup>r</sup>                                                  | This study                    |
| pRKV2                   | pK18mobsacB with a 0.254kb PCR fragment <i>cheR2</i> 5' end and a 0.326kb PCR fragment downstream of <i>cheR2</i> 3' end of the Xoo genome; Km <sup>r</sup>                                        | This study                    |
| pRKV3                   | pK18mobsacB with a 0.275kb upstream PCR fragment including 6bp of <i>fliC</i> 5' end and a 0.401kb downstream PCR fragment including 27bp of <i>fliC</i> 3' end of the Xoo genome; Km <sup>r</sup> | This study                    |
| pRKV4                   | pK18mobsacB with a 0.373kb upstream PCR fragment including 12bp of <i>cheD</i> 5' end and a 0.409kb downstream PCR fragment including 9bp of <i>cheD</i> 3' end of the Xoo                         | This study                    |

|        |                                                                                                                                                                                                                   |            |
|--------|-------------------------------------------------------------------------------------------------------------------------------------------------------------------------------------------------------------------|------------|
|        | genome; Km <sup>r</sup>                                                                                                                                                                                           |            |
| pRKV5  | pK18mobsacB with a 0.347kb upstream PCR fragment including 4bp of <i>cheB2</i> 5' end and a 0.327kb PCR fragment of <i>cheB2</i> 3' end of the <i>Xoo</i> genome; Km <sup>r</sup>                                 | This study |
| pRKV6  | pK18mobsacB with a 0.358kb upstream PCR fragment including 100bp of <i>cheW2</i> 5' end and a 0.223kb PCR fragment of <i>cheW2</i> 3' end of the <i>Xoo</i> genome; Km <sup>r</sup>                               | This study |
| pRKV7  | pK18mobsacB with a 0.300kb PCR fragment of <i>cheA2</i> 5' end and a 0.259kb PCR fragment <i>cheA2</i> 3' end of the <i>Xoo</i> genome; Km <sup>r</sup>                                                           | This study |
| pRKV9  | pK18mobsacB with a 0.422kb upstream PCR fragment including 12bp of <i>mcp2</i> 5' end and a 0.228kb downstream PCR fragment including 27bp of <i>mcp2</i> 3' end of the <i>Xoo</i> genome; Km <sup>r</sup>        | This study |
| pRKV10 | pK18mobsacB with a 0.264kb upstream PCR fragment including 99bp of <i>cheA3</i> 5' end and a 0.312kb downstream PCR fragment including 12bp of <i>cheA3</i> 3' end of the <i>Xoo</i> genome; Km <sup>r</sup>      | This study |
| pRKV11 | pK18mobsacB with a 0.513kb upstream PCR fragment including 9bp of <i>cheW3</i> 5' end and a 0.235kb downstream PCR fragment including 18bp of <i>cheW3</i> 3' end of the <i>Xoo</i> genome; Km <sup>r</sup>       | This study |
| pRKV12 | pK18mobsacB with a 0.332kb upstream PCR fragment including 15bp of <i>cheR3</i> 5' end and a 0.303kb downstream PCR fragment including 240 bases of <i>cheR3</i> 3' end of the <i>Xoo</i> genome; Km <sup>r</sup> | This study |
| pRKV13 | pK18mobsacB with a 0.364kb upstream PCR fragment including 9bp of <i>cheV</i> 5' end and a 0.326kb downstream PCR fragment including 12 bases of <i>cheV</i> 3' end of the <i>Xoo</i> genome; Km <sup>r</sup>     | This study |
| pRKV14 | pK18mobsacB with a 0.269kb upstream PCR fragment including 6bp of <i>cheZ</i> 5' end and a 0.312kb downstream PCR fragment including 12 bases of <i>cheZ</i> 3' end of the <i>Xoo</i> genome; Km <sup>r</sup>     | This study |
| pRKV15 | pK18mobsacB with a 0.564kb upstream PCR fragment including 321bp of <i>cheA1</i> 5' end and a 0.323kb downstream                                                                                                  | This study |

|        |                                                                                                                                                                                                                   |            |
|--------|-------------------------------------------------------------------------------------------------------------------------------------------------------------------------------------------------------------------|------------|
|        | PCR fragment including 177 bases of <i>cheA1</i> 3' end of the <i>Xoo</i> genome; Km <sup>r</sup>                                                                                                                 |            |
| pRKV16 | pK18mobsacB with a 0.384kb upstream PCR fragment including 99bp of <i>cheR1</i> 5' end and a 0.311kb downstream PCR fragment including 69 bases of <i>cheR1</i> 3' end of the <i>Xoo</i> genome; Km <sup>r</sup>  | This study |
| pRKV17 | pK18mobsacB with a 0.362kb upstream PCR fragment including 99bp of <i>cheB1</i> 5' end and a 0.285kb downstream PCR fragment including 78 bases of <i>cheB1</i> 3' end of the <i>Xoo</i> genome; Km <sup>r</sup>  | This study |
| pRKV18 | pK18mobsacB with a 0.350kb PCR fragment of <i>vieA</i> 5' end and a 0.302kb PCR fragment of <i>vieA</i> 3' end of the <i>Xoo</i> genome; Km <sup>r</sup>                                                          | This study |
| pRKV19 | pK18mobsacB with a 0.376kb upstream PCR fragment including 99bp of <i>cheW1</i> 5' end and a 0.329kb downstream PCR fragment including 69 bases of <i>cheW1</i> 3' end of the <i>Xoo</i> genome; Km <sup>r</sup>  | This study |
| pRKV20 | pK18mobsacB with a 1.217kb PCR fragment including <i>cheR2</i> ORF and 346bp downstream of the <i>Xoo</i> genome; Km <sup>r</sup>                                                                                 | This study |
| pRKV21 | pK18mobsacB with a 1.420kb PCR fragment including 343bp upstream and <i>cheB2</i> ORF of the <i>Xoo</i> genome; Km <sup>r</sup>                                                                                   | This study |
| pRKV22 | pK18mobsacB with a 1.306kb PCR fragment including 283bp upstream and <i>cheW2</i> ORF of the <i>Xoo</i> genome; Km <sup>r</sup>                                                                                   | This study |
| pRKV23 | pHM1:: <i>cheA2</i> ORF, Spec <sup>r</sup>                                                                                                                                                                        | This study |
| pRKV24 | pK18mobsacB with a 0.354kb upstream PCR fragment including 150bp of <i>cheY1</i> 5' end and a 0.278kb downstream PCR fragment including 90 bases of <i>cheY1</i> 3' end of the <i>Xoo</i> genome; Km <sup>r</sup> | This study |
| pRKV25 | pK18mobsacB with a 0.225kb upstream PCR fragment including 72bp of <i>cheY2</i> 5' end and a 0.162kb downstream PCR fragment including 39 bases of <i>cheY2</i> 3' end of the <i>Xoo</i> genome; Km <sup>r</sup>  | This study |

|        |                                                                                                                                                                           |            |
|--------|---------------------------------------------------------------------------------------------------------------------------------------------------------------------------|------------|
| pRKV26 | pK18mobsacB with a 0.785kb PCR fragment including 204bp upstream, <i>cheY1</i> ORF and 188bp downstream fragment of the <i>Xoo</i> genome; Km <sup>r</sup>                | This study |
| pRKV27 | pK18mobsacB with a 2.712kb PCR fragment including 142bp upstream, <i>mcp1</i> ORF and 401bp downstream fragment of the <i>Xoo</i> genome; Km <sup>r</sup>                 | This study |
| pRKV28 | pK18mobsacB with a 2.873kb PCR fragment including 12bp upstream, <i>mcp2</i> ORF and 27bp downstream fragment of the <i>Xoo</i> genome; Km <sup>r</sup>                   | This study |
| pRKV29 | pK18mobsacB with a 2.712kb PCR fragment including 142bp upstream, <i>mcp1</i> ORF and 401bp downstream fragment of the <i>Xoo</i> genome; Km <sup>r</sup>                 | This study |
| pRKV30 | pVO155 with 443bp predicted promoter PCR fragment upstream of <i>cheR2</i> in front of <i>gusA</i> ORF; Km <sup>r</sup> Amp <sup>r</sup>                                  | This study |
| pRKV31 | pVO155 with 584bp predicted promoter PCR fragment upstream of <i>flhF</i> ( <i>cheA2</i> containing operon) in front of <i>gusA</i> ORF; Km <sup>r</sup> Amp <sup>r</sup> | This study |
| pRKV32 | pVO155 with 476bp predicted promoter PCR fragment upstream of <i>motA</i> in front of <i>gusA</i> ORF; Km <sup>r</sup> Amp <sup>r</sup>                                   | This study |
| pRKV33 | pVO155 with 650bp predicted promoter PCR fragment upstream of <i>fliC</i> in front of <i>gusA</i> ORF; Km <sup>r</sup> Amp <sup>r</sup>                                   | This study |
| pRKV34 | pK18mobsacB with the wild type <i>mcp2</i> along with 0.422kb upstream and a 0.228kb downstream sequence flanking the <i>mcp2</i> ORF; Rif <sup>r</sup>                   | This study |

1

2 The rif<sup>r</sup> Spec<sup>r</sup>, Amp<sup>r</sup> and Kan<sup>r</sup> indicate resistance to rifampicin; spectinomycin, ampicilin and  
3 kanamycin, respectively.

4 **References:**

5 Innes, R.W., Hirose, M.A., and Kuempel, P.L. (1988). Induction of nitrogen-fixing nodules on  
6 clover requires only 32 kilobase pairs of DNA from *Rhizobium trifolii* symbiosis plasmid. *J*

1 *Bacteriol* **170**: 3793–3802.

2 Oke, V., and Long, S.R. (1999) Bacterial genes induced within the nodule during the Rhizobium  
3 - legume symbiosis. *Mol Microbiol* **32**: 837–849.

4 Pridmore, R.D. (1987) New and versatile cloning vectors with kanamycin-resistance marker.  
5 *Gene* **56**: 309-312.

6 Schäfer, A., Tauch, A., Jäger, W., Kalinowski, J., Thierbach, G., and Pühler, A. (1994) Small  
7 mobilizable multi-purpose cloning vectors derived from the *Escherichia coli* plasmids pK18 and  
8 pK19: selection of defined deletions in the chromosome of *Corynebacterium glutamicum*. *Gene*  
9 **145**: 69–73.

10

11

12

13

14

15

16

17

18

19

20

21

22
