# Supplementary material
Source: PubMed Central journal article supplement (PMC6638100)
Supplement: MPP-19-2397-s014.pdf [file MPP-19-2397-s014.pdf]

1 **Table S3.** Mutants of chemotaxis component of *Xoo* exhibit virulence deficiency in epiphytic  
 2 (surface inoculation) mode of infection.

3

| Strain <sup>a</sup>            | Efficiency of infection (%) <sup>b</sup> |              |              | Lesion length (cm) <sup>c</sup> |            |            |
|--------------------------------|------------------------------------------|--------------|--------------|---------------------------------|------------|------------|
|                                | Exp 1                                    | Exp 2        | Exp3         | Exp 1                           | Exp 2      | Exp3       |
| Buffer control                 | 0                                        | 0            | 0            | 0                               | 0          | 0          |
| <i>Xoo</i> (WT)                | 72.5 (29/40)                             | 75.9 (23/30) | 69.3 (21/30) | 13.75±2.14                      | 11.02±1.95 | 11.43±2.25 |
| $\Delta$ <i>fliC</i>           | 0                                        | 0            | 0            | 0                               | 0          | 0          |
| $\Delta$ <i>mcp2</i>           | 0                                        | 0            | 0            | 0                               | 0          | 0          |
| $\Delta$ <i>cheW2</i>          | 0                                        | 0            | 0            | 0                               | 0          | 0          |
| $\Delta$ <i>cheW2</i> (CheW2+) | 85 (34/40)                               | 79.2 (24/30) | 72.6 (22/30) | 10.57±1.86                      | 10.95±2.24 | 11.01±2.25 |
| $\Delta$ <i>cheA2</i>          | 0                                        | 0            | 0            | 0                               | 0          | 0          |
| $\Delta$ <i>cheA2</i> (CheA2+) | 62.5 (25/40)                             | 69.3 (21/30) | 66 (20/30)   | 7.3±1.57                        | 7.02±1.69  | 6.99±2.18  |
| $\Delta$ <i>cheY1</i>          | 0                                        | 0            | 0            | 0                               | 0          | 0          |
| $\Delta$ <i>cheY1</i> (CheY1+) | 67.5 (27/40)                             | 75.9 (23/30) | 72.6 (22/30) | 11.24±1.8                       | 10.85±2.36 | 11.58±2.59 |
| $\Delta$ <i>cheR2</i>          | 7.5 (3/40)                               | 0            | 0            | 0                               | 0          | 0          |
| $\Delta$ <i>cheR2</i> (CheR2+) | 80 (32/40)                               | 79.2 (24/30) | 75.9 (23/30) | 10.86±2.82                      | 10.28±2.26 | 12±2.62    |
| $\Delta$ <i>cheB2</i>          | 2.5 (1/40)                               | 0            | 0            | 0                               | 0          | 0          |
| $\Delta$ <i>cheB2</i> (CheB2+) | 75 (30/40)                               | 72.6 (22/30) | 75.9 (23/30) | 12.58±1.63                      | 10.32±2.78 | 11.89±2.4  |

4 <sup>a</sup> The fresh, healthy rice leaves with intact tips of 30-day-old susceptible rice plants (TN-1), pre-adapted in  
 5 humid chambers were either dipped in water (control) alone or with bacterial suspension. Lesion lengths  
 6 were measured 21 dpi. <sup>b</sup> The percentage efficiency of infection is presented. Values in parentheses  
 7 indicate the number of leaves that exhibited infection symptoms compared with the total number of  
 8 infected leaves. <sup>c</sup> Lesion lengths (cm) measured 21 dpi. The lesion length was measured from at least 30

1 infected leaves from three independent experiments, and the mean values were determined  $\pm$ SD. The data  
2 presented above is statistically significant with p-value  $<0.001$  for all the mutants compared with wild  
3 type as determined by student's t-test.

4
