# Supplementary material
Source: PubMed Central journal article supplement (PMC6638100)
Supplement: MPP-19-2397-s015.pdf [file MPP-19-2397-s015.pdf]

**Table S4.** Oligonucleotides used in this study.

| Oligonucleotide name                 | Sequence (5' –3')                    |
|--------------------------------------|--------------------------------------|
| SCV <i>PcheR2::gusA</i> F HindIII    | GCAAGCTTGTGTTCAAACCTGGACGAATCGGCT    |
| SCV <i>PcheR2::gusA</i> R XbaI       | GCTCTAGAACGCGTCGTGAGCTATCACTG        |
| SCV <i>PcheA2::gusA</i> F HindIII    | GCAAGCTTATCCCGCAGACGCCCGCATGTGT      |
| SCV <i>PcheA2::gusA</i> R XbaI       | GCTCTAGAGCGAATTGCCTCGAGGAACGGGAC     |
| SCV <i>PmotA::gusA</i> F HindIII     | GCAAGCTT GCTCGACCTATGTCACCCTCAAATGGA |
| SCV <i>PmotA::gusA</i> R XbaI        | GCTCTAGAGCATGTGGTATCGGCCAGGCGCGG     |
| SCV <i>PfliC::gusA</i> F HindIII     | GCAAGCTTTTTTGCCGCAGAAAACCTGGGTTTTCTT |
| SCV <i>PfliC::gusA</i> R XbaI        | GCTCTAGAGCAACCAACTCGTCCACCGACCGCGAAG |
| SCV $\Delta$ <i>cheR2</i> F1 PstI    | GCCTGCAGATGGATATGACGACTACGAC         |
| SCV $\Delta$ <i>cheR2</i> R1 XbaI    | GCTCTAGAAAGAACGAGGTCAGGTTGGTG        |
| SCV $\Delta$ <i>cheR2</i> F2 XbaI    | GCTCTAGAATGAGTACGGCCGTGCAAGT         |
| SCV $\Delta$ <i>cheR2</i> R2 HindIII | GCAAGCTTCTGGTGAAGCCCTTGAGCACGTTG     |
| SCV $\Delta$ <i>cheD</i> F1 BamHI    | CCGGATCCTGTCGCCTCGCTGGACGCCTC        |
| SCV $\Delta$ <i>cheD</i> R1 XbaI     | GCTCTAGAGGCCGTACTCATTCATGCAGA        |
| SCV $\Delta$ <i>cheD</i> F2 XbaI     | GCTCTAGATTTCGAATGAATGACGCTGGAA       |
| SCV $\Delta$ <i>cheD</i> R2 HindIII  | GGAAGCTTCGGCCATCTTGACCTTGCTGA        |
| SCV $\Delta$ <i>cheB2</i> F1 XbaI    | GCTCTAGATGGAGTTGCTGATCAACGACATG      |
| SCV $\Delta$ <i>cheB2</i> R1 XhoI    | GCCTCGAGTCATTTCGAACAACCTCCACTCCACC   |
| SCV $\Delta$ <i>cheB2</i> F2 XhoI    | GCCTCGAGCGCGACGGTGC GCGTTGGCGTTGC    |
| SCV $\Delta$ <i>cheB2</i> R2 HindIII | GCAAGCTTTCAGCGTGCCTGGGCCGACAATGC     |
| SCV $\Delta$ <i>cheW2</i> F1 EcoRI   | GCGAATTCGGTGCAGCGCTCGCGCCACCGCGAGCT  |
| SCV $\Delta$ <i>cheW2</i> R1 XbaI    | GCTCTAGA CAGCGACCGCAGCAGGCGGGGCGAC   |
| SCV $\Delta$ <i>cheW2</i> F2 XbaI    | GCTCTAGAAGATATGGATCTGCACACCCG        |
| SCV $\Delta$ <i>cheW2</i> R2 HindIII | GCAAGCTT TCAATGCAGCAGATGGGTGGCA      |
| SCV $\Delta$ <i>cheA2</i> F1 EcoRI   | GGGAATTCATGAGTGCTGTTCCAGACGATA       |
| SCV $\Delta$ <i>cheA2</i> R1 XbaI    | GCTCTAGAGGCCTGCAGATAATCCAGCGA        |
| SCV $\Delta$ <i>cheA2</i> F2 XbaI    | GGTCTAGACCTGCCCTGATCGACCTGCG         |
| SCV $\Delta$ <i>cheA2</i> R2 HindIII | GGAAGCTTTC AATGATCGCTGGAGCGCAAT      |
| SCV $\Delta$ <i>fliC</i> F1 EcoRI    | GGGAATTCGCAGGCGGACGGAGTTTATTT        |
| SCV $\Delta$ <i>fliC</i> R1 XbaI     | GCTCTAGACATCAAGTTGGCCGTTACCGC        |
| SCV $\Delta$ <i>fliC</i> F2 XbaI     | GGTCTAGACAGAACGTGCTGAGCCTGCTG        |
| SCV $\Delta$ <i>fliC</i> R2 HindIII  | GGAAGCTTGTGATGCGTGCCTGCTCGGG         |
| SCV $\Delta$ <i>mcp2</i> F1 EcoRI    | GCGAATTCATTGGCAGGATTTCTGACCGCG       |
| SCV $\Delta$ <i>mcp2</i> R1 XbaI     | GGTCTAGAAAGAGATGTCATGGAATCGCT        |
| SCV $\Delta$ <i>mcp2</i> F2 XbaI     | GCTCTAGAACCGTTACCGCTGGCGATTGG        |

|                               |                                 |
|-------------------------------|---------------------------------|
| SCV $\Delta mcp2$ R2 HindIII  | GCAAGCTTCGGCCATAAGATCTGCGGAG    |
| SCV $\Delta cheY1$ F1 EcoRI   | GGGAATCTGGTGCTGTCTGCTGTACTACG   |
| SCV $\Delta cheY1$ R1 XbaI    | GGTCTAGAGAACGGGCCAGCACGCAACGC   |
| SCV $\Delta cheY1$ F2 XbaI    | GGTCTAGAGTGAACGGCTACATCATCAAG   |
| SCV $\Delta cheY1$ R2 HindIII | GCAAGCTTCAACGCCTGGCCGAGTTCG     |
| SCV $\Delta cheA3$ F1 EcoRI   | GCGAATTCCTGCGTCAGCTGCCGGACTAC   |
| SCV $\Delta cheA3$ R1 XbaI    | GGTCTAGAGCCCTCTTCAAGCGACAACAG   |
| SCV $\Delta cheA3$ F2 XbaI    | GGTCTAGACAGGCCGCGTAATGCAAATGC   |
| SCV $\Delta cheA3$ R2 HindIII | GCAAGCTTCTGTCCAGACCCGCTCACGCT   |
| SCV $\Delta cheW3$ F1 BamHI   | CGGGATCCGCGCGTCATCGACATCAGCAG   |
| SCV $\Delta cheW3$ R1 XbaI    | GGTCTAGAGATGTCCACGCCGTAGGTTCT   |
| SCV $\Delta cheW3$ F2 XbaI    | GCTCTAGAGTCGAAGAAGCCGCCTGATTC   |
| SCV $\Delta cheW3$ R2 HindIII | GCAAGCTTAAGCCTCCACACTGCCCGTG    |
| SCV $\Delta cheR3$ F1 EcoRI   | CGGAATTCAGTAGGACAGATGCGCAAAGC   |
| SCV $\Delta cheR3$ R1 XbaI    | GGTCTAGATTGTCGTCGTCGGTCATGGCGGC |
| SCV $\Delta cheR3$ F2 XbaI    | GCTCTAGAAACGTACACGCCACCTTCCCG   |
| SCV $\Delta cheR3$ R2 HindIII | GCAAGCTTGTCCGACGGCTGAGCGCGCT    |
| SCV $\Delta cheV$ F1 XbaI     | GCTCTAGAAACAGGTCCGGACGAAGACGA   |
| SCV $\Delta cheV$ R1 XhoI     | GGCTCGAGGTGGGTCATGGGGCAGATATC   |
| SCV $\Delta cheV$ F2 XhoI     | AGCTCGAGGAAGCGGCCTGATCCACCAG    |
| SCV $\Delta cheV$ R2 HindIII  | AGAAGCTTGGTGCTCTCCCGCGAAATGTT   |
| SCV $\Delta cheZ$ F1 EcoRI    | GGGAATTCGGTTGCGTGCTGGCCCGTTCG   |
| SCV $\Delta cheZ$ R1 XbaI     | GCTCTAGAGTTCATTCAGGCGGTGCGCCG   |
| SCV $\Delta cheZ$ F2 XbaI     | GCTCTAGATTGGGGCTGTAAATGAGTGCT   |
| SCV $\Delta cheZ$ R2 HindIII  | CGAAGCTTGGCCTGCAGATAATCCAGCGA   |
| SCV $\Delta cheA1$ F1 EcoRI   | GCGAATTCCTTGCTGCATCCGGGTGGATTG  |
| SCV $\Delta cheA1$ R1 XbaI    | GGTCTAGAGCTCGGATCTGCGGCGGTTTC   |
| SCV $\Delta cheA1$ F2 XbaI    | GGTCTAGAGTGGACACCTTGCTGGGCGAA   |
| SCV $\Delta cheA1$ R2 HindIII | GCAAGCTTGACCACGATAACGGGGAGGGC   |
| SCV $\Delta cheR1$ F1 EcoRI   | GCGAATTCACCGAACTCAAGCTGGATC     |
| SCV $\Delta cheR1$ R1 XbaI    | GGTCTAGAGCTGATGCCGGCGGCTTCGAA   |
| SCV $\Delta cheR1$ F2 XbaI    | GGTCTAGATCGGAAAGCCTGAGCGAACTC   |
| SCV $\Delta cheR1$ R2 HindIII | GCAAGCTTGC GCGG CATTTCACATCCAG  |
| SCV $\Delta cheB1$ F1 EcoRI   | GCGAATTCCTTGCTGGTGGAGCGGCGCCTG  |
| SCV $\Delta cheB1$ R1 XbaI    | GGTCTAGACGAATCGTCGACCACCAGGGC   |
| SCV $\Delta cheB1$ F2 XbaI    | GGTCTAGAGCGCTAGGCATCATCATGACC   |
| SCV $\Delta cheB1$ R2 HindIII | GCAAGCTTGATAAGGAATGTGGTGGCCAT   |
| SCV $\Delta vieA$ F1 EcoRI    | GCGAATTCATGCACACAAGGACTCCCATGC  |
| SCV $\Delta vieA$ R1 XbaI     | GGTCTAGAGCGCTGCGGCTGAGTTGCATCA  |
| SCV $\Delta vieA$ F2 XbaI     | GGTCTAGATCACCGAACTCAAGCTGGAT    |
| SCV $\Delta vieA$ R2 HindIII  | GCAAGCTTTCAGGCCACGTCCGCATCGC    |
| SCV $\Delta cheW1$ F1 EcoRI   | GCGAATTCGAAGAAGCTGGCTGCCACCTCC  |
| SCV $\Delta cheW1$ R1 XbaI    | GGTCTAGAGCCCAGGCCGAACATTTCCCC   |
| SCV $\Delta cheW1$ F2 XbaI    | GGTCTAGACTCGATACCGACGCCGTGCTG   |
| SCV $\Delta cheW1$ R2 HindIII | GCAAGCTTGAGCAACTGCACGCCGTCCAT   |
| SCV $\Delta pdeA$ F1 EcoRI    | GCGAATTCATGGCCAAGGCCGGCGAACAG   |
| SCV $\Delta pdeA$ R1 XbaI     | GCTCTAGACCTCGTGCATCTTGGTGTCCGT  |
| SCV $\Delta pdeA$ F2 XbaI     | GCTCTAGACCGGCTATTCCAGTCTTAGCCA  |
| SCV $\Delta pdeA$ R2 pstI     | GCCTGCAGCTAAGGCTGCGCGCCCAACCA   |

| <b>Oligonucleotides used for real-time RT-PCR</b> |                        |
|---------------------------------------------------|------------------------|
| SCRTF24                                           | CTCGTTCCGCGATTATCT     |
| SCRTR24                                           | AGGTCAGGTTGGTGGTCA     |
| SCRTF25                                           | CCGAACACATTCCCATCA     |
| SCRTR25                                           | GCGAAGAACCACACCTTG     |
| SCRTF26                                           | ATTCATCGCTGACCGAAC     |
| SCRTR26                                           | GACCTTGCTGACGATTTCTTCT |
| SCRTF27                                           | GCTCAATTTCAACCCAATCTAC |
| SCRTR27                                           | CTGCAATACCTCGTGCATCT   |
| SCRTF28                                           | CTTACC GCCACTATTTAC    |
| SCRTR28                                           | GCCTTCGATCACCATTTC     |
| SCRTF29                                           | CACGAAGAACATGGCAAC     |
| SCRTR29                                           | GCGTACATGACGACGAAGAA   |
| SCRTF31                                           | TTCGCCGGTAGATATGGAT    |
| SCRTR31                                           | CATGGTTTCGCCGTTCTC     |
| SCRTF32                                           | CTCACCAATTACTACGGCTTC  |
| SCRTR32                                           | CCAAGCAATTCGTCCACTTC   |
| SCRTF33                                           | TATCCAGACCTCGTCCAA     |
| SCRTR33                                           | GCTGCATTCAACGCCAAA     |
| SCRTF34                                           | GTGTTGAAAGCAGCCCAA     |
| SCRTR34                                           | CGTCGTTCAAGGTCAGGAT    |
| SCRTF35                                           | GAAGCCTCGTCCAAGAAA     |
| SCRTR35                                           | AGGATATTGGTCTGGAAC     |
| SCRTF37                                           | GTTGTTCTTGTGCTCTTG     |
| SCRTR37                                           | CGGTGGCGATGACCTGATA    |
| SCRTF38                                           | CATTTCCACGGTGTGTTC     |
| SCRTR38                                           | GCATGACGATGCGTGTGA     |
| SCRTF39                                           | CCAATATCCTGGCCTTGAATG  |
| SCRTR39                                           | AGTCGTCGATCAGGTGCTT    |
| SCRTF40                                           | GACATGATGAATGCCAAT     |
| SCRTR40                                           | CTGCTTGATGGATGCGAT     |
| SCRTF55                                           | GAACGGTCTTTGCCAGAT     |
| SCRTR55                                           | CTTCCAGCACTTCGACGAAAT  |
| SCRTF56                                           | ACCGTGACGAAATCCAGA     |
| SCRTR56                                           | TCGCGGAAGAAGTAGGTT     |
| SCRTF57                                           | TGTTGGGCGAAGACCATT     |
| SCRTR57                                           | TGAGTTCAGCACCAGAT      |
| SCRTF58                                           | CATGGTGAGGTGCATCAA     |
| SCRTR58                                           | GTGCGATCTCCAGCACTT     |
| SCRTF59                                           | GTGTCAGTCAGATCAATACC   |
| SCRTR59                                           | CCTGTGCGCTCATTCTT      |
| SCRTF                                             | AAGTCGGTGGTGGAAAAG     |
| SCRTR                                             | CCGTGGTCCATCGCATTG     |
| SCRTF74                                           | ACCAATACGGTGGAAAGTG    |
| SCRTR74                                           | TATCGGCGAGCGAAATGGTT   |
| SCRTF75                                           | CAAGTAATCAACACCAACGTAA |
| SCRTR75                                           | GACGAAAGCTGCTGGATG     |

|                  |                        |
|------------------|------------------------|
| SCRTF84          | GTGGAACGCATCGTCAATA    |
| SCRTR84          | CACCGCCGTCAAATAAGT     |
| SCRTF2623        | ACCATGTGGTGGAAATGACC   |
| SCRTR2623        | TGAGGTCCTGGTAGCTCTGC   |
| SCRTF2624        | ATGAGTGCTGTTCCAGACGATA |
| SCRTR2624        | GGCCTGCAGATAATCCAGCGA  |
| 16S Xoo RT F     | GGGAATTGCAGTGGATAC     |
| 16S Xoo RT R     | CTGATGTTCCCTCCCGATCTCT |
| SCRTF75          | CAAGTAATCAACACCAACGTAA |
| SCRTR75          | GACGAAAGCTGCTGGATG     |
| SCRTF82          | GAAGAGCTGGCCGATAAC     |
| SCRTR82          | CGTCCCACATCGTGCTTT     |
| SCV XOO 0309F    | CGATTTTCATTGCCGAGCTGG  |
| SCV XOO 0309R    | AGGTGGATAACGCATCGGAC   |
| SCV XOO2699 RT F | TGTCACGCTATGGATCGACG   |
| SCV XOO2699 RT R | GCTCAGGCCTTTAGTGACGT   |
| 16S Xoo RT F     | GGGAATTGCAGTGGATAC     |
| 16S Xoo RT R     | CTGATGTTCCCTCCCGATCTCT |
| SCRTF5           | GCAATTTTCGCTATACACAC   |
| SCRTR5           | ATTGGGATGCCAGCTACA     |
| SCRTF121         | CAGTCTGATCGGTGTGGA     |
| SCRTR121         | CCGCATTTTCGCCGATGA     |
| SCRTF54          | CGGATACCTCACCGAAAA     |
| SCRTR54          | CACACGCAGATTGCTGAT     |
| SCV XOO0897 RT F | CGTCGTTTCGGAAGACTCCAA  |
| SCV XOO0897 RT R | GGCTGCGAGGCATAGGTATT   |
| SCRTF103         | CGCTGAAGCACGAATACA     |
| SCRTR103         | ATATCTGCCAGCGTCACG     |

1  
2  
3  
4  
5  
6  
7  
8
